# Supplementary material for: Emerging trends in invasive and noninvasive isolates of Streptococcus agalactiaein a Latin American hospital: a 17-year study
Source: PubMed Central journal article supplement (PMC4131052; doi:10.1186/1471-2334-14-428), 2014-08-03
Supplement: 12879_2014_3728_MOESM1_ESM.pdf [file 12879_2014_3728_MOESM1_ESM.pdf]

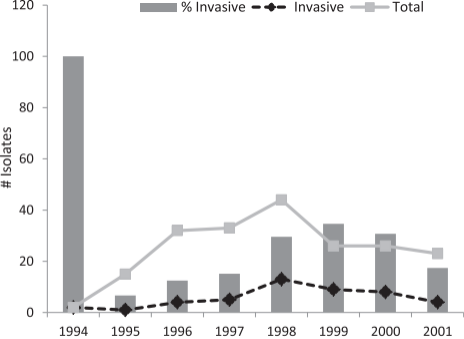

n=201

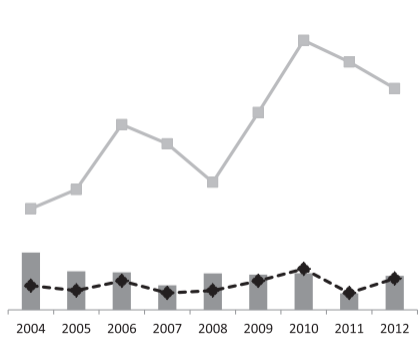

n=671
